# Supplementary material
Source: Springer Nature journal article supplement (https://www.springermedizin.de/resource/supplementary/12913_2010_1430_MOESM3_ESM.pdf/9528110)
Supplement: MOESM3 [file 9528110]

Referral  
to Central  
Intake

```
graph LR; A[Referral to Central Intake] --> B[Wait Listed Patients (over 2000 patients; several year wait time)]; B --> C[Intensive lifestyle counselling for approximately 6-8 months (~ 600-800 new patients assessed annually); Bariatric surgery in interested and suitable candidates (n=100-150 surgeries performed annually)];
```

Wait Listed  
Patients  
(over 2000  
patients;  
several year  
wait time)

Intensive lifestyle counselling  
for approximately 6-8 months  
(~ 600-800 new patients  
assessed annually)

Bariatric surgery in interested  
and suitable candidates  
(n=100-150 surgeries  
performed annually)
